# Supplementary material for: Analysis of MIR27A (rs11671784) Variant Association with Systemic Lupus Erythematous
Source: MDPI journal article supplement (doi:10.3390/life13030701), 2023-03-05
Supplement: s1 [file s1]

**Supplementary Table S1.** Laboratory-related parameters of patients with systemic lupus erythematosus.

| Laboratory test                                        | Value         |
|--------------------------------------------------------|---------------|
| Hemoglobin (g/dL)                                      | 11.6 ± 2.9    |
| RBC (x10 <sup>6</sup> per mm <sup>3</sup> )            | 4.1 ± 0.7     |
| HCT (%)                                                | 38.0 ± 6.1    |
| MCV (fl)                                               | 81.5 ± 6.3    |
| Platelet count (x10 <sup>3</sup> per mm <sup>3</sup> ) | 263.9 ± 77.4  |
| WBC (x10 <sup>3</sup> /uL)                             | 6.5 ± 2.2     |
| Neutrophil (%)                                         | 63.4 ± 10.4   |
| Lymphocyte (%)                                         | 30.2 ± 10.0   |
| C3 (mg/dL)                                             | 96.3 ± 47.9   |
| C4 (mg/dL)                                             | 28.0 ± 15.5   |
| CRP (mg/L)                                             | 2.4 (1.5-3.2) |
| ESR first hour (mm/hour)                               | 26.8 ± 13.6   |
| ALT (U/L)                                              | 26.6 ± 9.6    |
| AST (U/L)                                              | 26.9 ± 8.8    |
| Serum creatinine (mg/dL)                               | 1.0 (0.8-1.2) |
| Urea (mg/dL)                                           | 35.0 ± 11.9   |
| Serum albumin (g/dL)                                   | 4.3 ± 0.6     |

Data are presented as mean ± SD. RBC: red blood cell, HCT: hematocrit, MCV: mean cell volume, WBC: white blood cell, C3/4: complement 3/4, CRP: C-reactive protein, ESR: erythrocyte sedimentation rate, ALT, alanine transaminase; AST, aspartate transaminase.

**Supplementary Table S2.** TargetScan Predicted Interactions for hsa-miR-27a-3p in Systemic lupus erythematosus (hsa05322) pathway

| No. | Gene Name | Gene Ensembl id                 | Context Score | Conservation Score |
|-----|-----------|---------------------------------|---------------|--------------------|
| 1.  | TROVE2    | <a href="#">ENSG00000116747</a> | -0.188        | 0.795              |
| 2.  | HLA-DOA   | <a href="#">ENSG00000204252</a> | -0.107        | 0.735              |
| 3.  | CD28      | <a href="#">ENSG00000178562</a> | -0.123        | 0.371              |
| 4.  | H3F3B     | <a href="#">ENSG00000132475</a> | -0.119        | 0.791              |
| 5.  | GRIN2A    | <a href="#">ENSG00000183454</a> | -0.168        | 0.414              |
| 6.  | IL10      | <a href="#">ENSG00000136634</a> | -0.100        | 0.607              |
| 7.  | GRIN2B    | <a href="#">ENSG00000273079</a> | 0.164         | 0.291              |

Data retrieved from <https://dianalab.e-ce.uth.gr/> (last accessed 20 Dec 2022)
